# Supplementary material for: Crowdsourced analysis of fungal growth and branching on microfluidic platforms
Source: PLoS One. 2021 Sep 29;16(9):e0257823. doi: 10.1371/journal.pone.0257823 (PMC8480888; doi:10.1371/journal.pone.0257823)
Supplement: S1 Data — (XLSX) [file pone.0257823.s002.xlsx]

## Sheet: Figure 1
	Figure 1b
		Time (min)	T. versicolor 1	T versicolor 2	T. versicolor 3	T. versicolor 4	T. versicolor 5	T. versicolor 6	T. versicolor 7	T. versicolor 8	M. oryzae 1	M. oryzae 2	M. oryzae #3	M. oryzae mutant 1	A. fumigatus 1	A. fumigatus 2	A. fumigatus 3	A. fumigatus Hook KO 1	A. fumigatus Hook KO 2	A. fumigatus Hook KO 3	A. fumigatus 293	A. fumigatus clinical 1	A. fumigatus clinical 2	A. fumigatus clinical 3	R. stolonifer 1	R. stolonifer 2	R. stolonifer 3	R. stolonifer 4	R. microsporus	N. crassa 1	N. crassa 2	N. crassa 3	N. crassa 4	C. neoformans 1	C. neoformans 2	M. anisopilae	A. nidulans 1	A. nidulans 2	A. nidulans 3	A. nidulans 4	A. nidulans 5	A. nidulans 6	A. nidulans 7	A. nidulans 8	A. nidulans 9	A. nidulans AYR32	A. nidulans AYR32 2
		0	0	0	0	0	0	0	0	0	0	0	0	0	0	0	0	0	0	0	0	0	0	0	0	0	0	0	0	0	0	0	0	0	0	0	0	0	0	0	0	0	0	0	0	0	0
		5													7.37467	11.5694	13.2222	22.7546	2.80536	7.9884	5.83114	9.21834	9.40414	18.5224						11.2577	8.36535	5.29177	14.2443				2.08771	11.2577	78.5719	18.7024	14.9619	7.37467	12.9057	15.8971	11.8304	4.67561	9.7644
		10									1.87024	10.4531	6.27039	10.6633	15.6212	24.6973	24.4436	40.6234	11.2215	12.1711	9.94723	18.4367	18.6225	29.7416					24.9511	22.4792	28.0029	10.743	27.6332				18.4197	40.2609	81.2178	37.7745	30.9677	18.5939	25.94	31.12	24.1319	8.85828	13.1352
		15	53.3091	75.7448	97.7859	71.9031	42.4472	51.6513	52.4393	65.9949					30.3705	36.2668	35.8173	49.8369	20.7611	16.9409	19.8802	23.6533	29.6845	42.6473	37.0592	27.655	92.3549	22.1209		37.702	39.7173	14.1138	46.7053	5.83114	26.8404	23.378	37.1439	55.2519	88.6988	56.8467	49.7644	31.6282	37.002	42.4936	37.3541	19.1446	18.1732
		20									4.82783	34.1283	11.8811	14.0341	37.9738	46.0311	41.5078	66.901	26.7488	23.2113	23.9963	27.3406	38.9028	51.8657					51.1345	42.7401	52.9395	17.0714	63.639				53.0699	67.4447	101.827	72.7727	64.7553	44.6625	51.8657	53.7513	49.5469	23.8202	23.8637
		25													45.5772	61.9572	59.2968	75.7231	35.1142	29.4817	23.9963	32.8716	53.7665	59.2403						53.1932	66.0311	20.9279	81.6962				66.1616	140.391	114.918	87.9956	81.6165	55.7245	66.7293	68.7133	64.5378	31.8086	32.7365
		30	104.023	131.859	156.898	151.952	70.6454	114.365	86.1181	111.852	11.3737	43.8927	18.1515	27.1258	52.9519	73.2149	74.5197	90.685	42.5951	36.0275	33.4004	36.9877	63.1706	68.6445	56.3105	95.8707	230.744	51.6726	71.7941	60.9061	74.4472	23.7332	101.356	9.94723	48.9644	32.7292	124.618	159.304	128.945	106.72	94.7444	66.9437	79.7636	81.8412	79.6158	40.6814	41.3556
		35													64.0139	87.2707	86.7125	103.907	50.0761	43.1461	36.0016	46.206	69.0018	83.3938						67.4519	86.6401	24.6684	121.196				146.51	172.526	144.871	143.298	109.706	81.6931	90.9829	97.7673	98.3182	54.7082	47.9014
		40									15.5564	64.4654	22.8271	39.6738	80.6069	104.103	100.863	117.963	61.0221	48.1841	37.8452	52.0372	76.3765	92.6122					102.668	80.5436	92.9104	28.4088	140.109				170.823	193.121	156.129	162.095	124.494	92.9123	107.676	112.729	108.771	59.3838	58.1877
		45	153.904	198.572	234.689	222.112	118.609	137.689	141.29	174.846					89.8252	114.766	114.918	146.966	73.3236	53.2222	43.6763	59.4118	89.7966	103.674	83.9655	213.865	287.927	90.4271		90.8735	120.174	35.5273	165.785	21.1665	71.1599	33.6644	179.645	211.845	177.637	181.007	143.197	111.721	111.363	123.951	123.849	67.3722	65.6687
		50									15.5564	78.3689	25.6325	50.6198	101.044	128.916	131.78	162.972	81.312	59.8332	47.7925	66.7865	105.003	120.267					121.37	102.095	158.695	36.8467	185.625				200.304	254.955	187.923	198.797	157.224	123.383	139.018	138.913	140.913	78.7459	74.2878
		55													108.648	142.138	143.001	175.165	89.7789	60.7684	49.6361	74.1612	134.559	129.671						109.213	198.644	38.166	209.938				238.826	273.657	202.885	213.758	172.185	133.316	153.882	153.875	152.171	86.2848	79.0576
		60	168.865	265.023	315.825	308.764	162.9	170.875	186.647	236.085	19.2968	83.6607	35.9623	64.4291	119.71	156.165	159.935	188.554	100.232	67.8869	55.4672	85.2232	143.963	135.502	93.1838	309.893	361.702	125.495	143.204	120.783	204.335	40.9714	229.598	32.3857	75.276	70.714	256.02	292.381	215.042	233.599	189.018	151.752	168.631	167.901	166.227	93.8238	90.627
		65													132.615	172.062	171.192	203.632	114.382	75.5998	60.9983	94.4415	153.182	146.565						129.199	218.391	47.7782	256.781				271.693	307.372	232.831	252.671	210.525	161.157	178.035	182.892	181.189	102.291	103.849
		70									32.3885	107.206	41.0003	76.4045	145.65	185.154	183.385	215.933	123.777	83.1388	62.8419	101.816	160.785	161.314					151.192	140.457	252.055	56.245	283.378				287.256	325.161	248.836	293.911	228.394	175.906	193.785	199.724	193.382	110.279	116.151
		75	269.083	318.456	369.32	382.883	220.326	237.347	238.383	285.727					156.869	198.376	199.282	226.386	136.905	89.054	70.4453	111.22	168.16	176.063	107.933	372.692	442.823	167.936		147.996	254.143	59.9855	302.653	43.6049	80.807	89.9891	305.415	340.152	262.986	308.989	240.696	194.428	212.222	213.78	208.459	117.398	124.77
		80									38.9344	126.118	48.1189	78.4922	170.289	212.896	217.702	245.11	152.831	98.5936	72.2889	122.282	177.378	183.438					155.868	153.034	265.712	68.4016	335.505				327.307	410.286	278.913	330.576	259.493	205.648	228.915	225.937	222.515	132.359	137.898
		85													185.153	227.858	237.542	261.972	168.054	108.133	76.405	137.489	187.311	198.302						167.06	278.014	75.0126	363.806				435.926	419.681	293.875	353.041	275.498	224.084	238.848	246.51	233.737	143.929	146.77
		90	270.402	375.571	441.251	423.443	249.881	279.909	287.981	314.773	46.4733	134.991	55.5998	89.7136	194.371	242.936	247.829	278.833	181.442	119.355	87.467	152.696	194.914	209.363	148.494	431.69	525.803	208.491	158.826	196.984	283.465	87.3142	387.647	54.3525	82.6506	105.328	463.979	452.41	308.836	368.967	294.295	242.607	253.712	257.731	244.067	155.303	158.144
		95													209.235	257.898	262.82	294.056	194.534	126.836	91.1544	156.383	200.445	220.425						198.304	307.851	94.7952	439.623				522.022	463.668	323.798	386.734	309.373	261.043	268.461	272.722	252.533	166.524	169.366
		100									55.8245	155.564	66.2631	99.2533	222.269	272.86	278.746	311.801	214.172	136.187	102.374	161.914	220.726	235.175					167.445	203.073	320.978	101.341	466.807				583.914	472.541	342.501	465.284	327.14	279.48	290.585	292.359	260.014	178.681	177.833
		105	271.337	454.208	548.198	508.252	310.837	329.831	348.793	392.475					238.862	294.694	293.737	333.635	230.069	140.37	104.217	172.976	228.1	242.549	159.713	494.489	606.924	265.637		208.989	345.306	108.822		71.3457	90.254	120.667		494.23	358.398	484.081	346.981	296.173	307.178	307.35	272.49	189.902	189.09
		110									62.5661	168.655	74.8822	111.555	246.465	303.313	307.793	352.432	243.161	152.671	115.279	185.882	236.347	251.768					176.984		374.295	119.152						510.801	375.462	590.888	364.77	309.207	320.084	327.539	278.76	203.958	203.24
		115													265.274	321.102	321.181	368.358	259.993	165.147	118.967	193.485	264.245	262.83							377.1	128.691						525.879	387.764	604.277	380.667	327.73	331.889	344.603	293.751	214.288	217.267
		120	273.425	520.841	625.632	570.094	344.223	372.878	350.663	427.075	70.0471	175.266	84.4219	120.768	278.18	334.193	341.841	388.952	277.782	179.449	126.341	204.547		272.048	179.565	566.42	682.543	326.498	184.465		381.776	134.382		82.4077	116.065	137.209		546.473	405.531		399.369	346.166	343.108	359.594	303.102	221.769	232.345
		125													294.772	352.352	357.267	407.655	297.622	195.593	138.704	215.609		277.579								141.5						561.696	424.255		420.957	361.03	351.354	371.895	314.476	232.99	244.647
		130									82.5951	182.073	86.5096	126.459	309.979	363.61	374.128	419.848	316.694	206.85	142.391	219.296		283.11					188.322			150.852						577.84	439.681		440.797	381.311	366.218	384.371	328.626	244.364	258.796
		135	275.295	581.689	681.071	646.484	644.741	430.032	356.354	494.636					358.058	383.269	388.155	439.507	335.491	216.245	146.507	226.671		292.329	226.242	654.931		396.648				159.471		90.6542	149.251	155.911		601.218	458.594		458.586	407.122	377.28	401.232	339.884	256.665	267.416
		140									98.021	194.375	89.3149	130.315	373.264	400.514	405.922	450.881	354.404	230.149	153.882	235.889		297.86					198.652			171.301						616.179	474.519		483.907	423.715	392.03	417.158	354.846	268.039	276.035
		145													397.303	413.236	420.913	467.713	375.498	241.979	167.302	238.491		301.547								184.393						633.969	492.504		504.48	434.777	405.45	427.445	365.132	275.578	290.997
		150	275.295	637.796	745.628	746.2	936.54	474.28	393.758	566.321	105.56	208.43	97.0279	134.172	421.342	428.198	439.616	486.509	400.094	260.138	170.989	242.178		308.922	253.897	721.303		463.239	207.271			194.846		109.462	158.655	174.614			504.806		523.204	455.057	422.043	434.983	380.094	293.367	301.66
		155													430.747	446.901	452.338	502.653	421.007	275.128	176.52	251.582		316.296								208.996							522.573		530.743	471.65	433.105	440.971	393.222	301.783	315.962
		160									108.365	227.155	104.567	150.098	449.269	459.094	475.788	520.42	444.552	284.342	183.895	260.8		323.671					221.79			226.785							541.486		541.964	504.836	446.01	448.684	408.184	316.745	328.119
		165	380.13	701.391	830.751	794.449	982.775	524.902	431.178	629.909					462.303	472.222	487.01	543.82	460.478	301.812	187.583	264.916		329.202	287.083	772.926		501.993				238.006		131.586	173.519	195.121			557.629		562.624	519.586		455.803	422.334	330.801	343.197
		170									119.268	232.845	111.178	156.839	478.896	489.054	505.168	560.152	484.791	314.94	198.644	273.163		334.733					230.663			256.803							573.526		586.024	532.491		465.197	434.81	342.957	355.672
		175													497.705	500.623	520.246		514.73	334.012	215.238	273.163		342.336								275.527							590.46		600.326	549.184		472.678	446.067	354.179	368.8
		180	419.405	759.558	913.902	850.245		576.654	497.629	690.721	123.124	257.318	115.948	166.604	518.314		535.208		533.642	350.873		280.538		347.867	322.113	811.814		503.837	236.354			291.424		140.991	203.075	217.035			605.422		616.223	567.621		483.936	460.217	370.322	376.738
		185													529.533		553.077		554.302	362.131		287.912		355.242								306.85							624.146		639.601	586.058		498.927	471.475	381.892	388.307
		190									126.495	269.619	126.234	177.057	551.957		564.298		576.825	374.607		291.6		360.773					240.094			324.639							641.007		656.462	608.182		512.055	490.547	399.659	397.658
		195	458.68	786.676		918.49		602.536	557.593	747.321					568.45		577.39			390.612		321.098		399.49	351.841	867.253		542.548				343.342		159.427	228.958	234.28			655.034		676.1	630.377		520.522	499.761	404.429	406.125
		200									132.41	303.298	132.845	181.732	593.047		590.482			407.474		350.597		440.051					240.094			373.28							674.672		695.759	648.814		534.672	513.149	418.456	413.664
		205													600.421		602.638			424.306		365.804		449.269								388.242							695.331		714.461	837.268		544.066	526.277	428.786	418.34
		210	505.668	827.915				681.9	586.959	772.997	135.056	319.63	137.883	189.721	626.304		616.665			441.167		376.866			366.59	911.501		577.616	241.413			405.176		174.291	241.992	252.983			711.663		735.034	857.634		558.122	541.5	447.488
		215													642.997		629.793			456.158		400.833										428.575							733.171		754.693	878		574.048	551.04	456.839
		220									138.427	344.893	148.336	197.709	665.193		643.182			472.084									246.089			545.618									773.418	898.366		592.773	563.762	469.931
		225	553.505	873.736					643.349	844.566					691.261		656.796			490.786					394.488	965.096		601.866				567.125		181.894	269.704	258.275					792.12	916.803		604.03	578.282	486.763
		230									153.215	345.828	152.519	203.32	702.48					510.424									250.272			587.72									813.649	937.169		617.158	589.851	494.751
		235													713.7					531.953												613.041									830.511	952.033			609.51	507.843
		240	595.165	943.16				744.699	701.326	905.378	161.58	361.725	160.884	212.671	732.136					551.613					423.986			628.26	253.229			623.494		218.81	288.513	274.36					851.083	970.47			617.223	521.232
		245													746.886					572.207												638.456									870.808	995.066			633.149	534.621
		250									163.668	373.099	169.706	223.929	765.694														258.681			660.043									885.77	1011.76			642.914	545.842
		255	667.169	969.409				800.495	768.662	968.097					785.974										446.411			646.422				678.767		244.622	297.731	290.257					911.018	1032.04			658.92	555.382
		260									164.603	383.385	176.252	231.047	806.34														263.356			702.312									926.009	1050.48			673.07	562.863
		265													815.559																											1065.23			679.811
		270	723.399	993.794				863.18	838.854	1023.27	178.086	409.467	183.791	248.916	833.995										468.535			663.113	266.314					263.059	308.95	304.806						1083.66			693.838
		275													845.057																														705.096
		280									184.893	416.774	190.402	258.311	867.181														273.121																713.969
		285	782.428	1033.25				922.291	894.034						896.68										490.659			674.331						268.59	332.989	323.508
		290									190.881	433.708	203.494	259.246	898.524														279.927
		295													916.017
		300	824.509	1070				996.238	950.141		197.427	445.081	204.429	262.204											512.854			681.704	295.353					271.191	344.209	332.33
		305
		310									202.102		227.829	262.204															299.21
		315	887.169					1040.49	1010.92																529.447			697.452						293.315	362.731	369.735
		320									207.553		229.148	270.62															303.885
		325
		330	929.757					1078.49	1063.3		216.375			283.711											551.571			722.531	308.923					333.875	371.949	386.981
		335
		340									220.341			293.106															309.858
		345	989.786																						573.695			731.748						346.781	392.315	417.397
		350									225.951			300.587															313.599
		355
		360	1040.59								235.303			313.715											598.292			746.495	324.82					348.625	421.814	433.94
		365
		370									240.072			330.547															325.756
		375	1090.29																						624.689			763.086						361.659	447.625	470.315
		380									249.286			342.117															329.612
		385
		390									252.243			347.408											654.245			776.504	333.795					369.262	470.05	472.403
		395
		400									255.049			350.054															348.315
		405																							685.644			791.366						378.666	481.712	510.235
		410									270.127			358.927															363.537
		415
		420									273.498			378.586											722.518			800.583	377.347					386.913	505.751	521.138
		425
		430									277.238			381.392															394.28
		435																							742.798			811.329							519.171	545.4
		440									283.508			395.911															411.142
		445
		450									316.172			415.752											774.198			825.362	442.95						529.104	585.161
		455
		460									325.567			431.649															469.148
		465																							801.853			842.853							542.524
		470									330.859			439.637															496.281
		475
		480									331.794			453.94											840.741			856.886	512.287						552.457
		485
		490									335.534			458.709															514.375
		495																							877.615			873.476							558.288
		500									343.015			466.647															520.362
		505
		510									345.821			485.444											909.443			918.361	527.104
		515
		520									355.447			496.346															540.13
		525																							937.641			936.881
		530									364.269			515.259															550.793
		535
		540									375.571			526.48											981.46			972.106	569.866
		545
		550									384.443			548.01															588.568
		555																							1000.27			1003.66
		560									391.055			558.296															606.314
		565
		570									398.767			562.479											1020.55			1031.55	633.548
		575
		580									412.156			565.85															657.934
		585																							1037.54			1063.11
		590									423.726			567.169															675.179
		595
		600									431.714			570.54											1055.98			1092.83
		605
		610									435.085			574.396
		615																							1071.18			1122.84
		620									444.48			578.137
		625
		630									462.537			578.137											1082.85			1143.2
		635
		640									472.077			579.072
		645																							1103.46			1172.92
		650									476.846			580.007
		655
		660									484.893			600.58											1131.36			1209.83
		665
		670									493.309			627.713
		675																							1149.79			1241.17
		680									503.972			638.97
		685
		690									517.361														1170.16			1279.93
		695
		700									524.103
		705																							1194.12
		710									532.468
		715
		720									540.935														1216.32
		725
		730									549.3
		735
		740									557.767
		745
		750									566.589
		755
		760									575.94
		765
		770									586.009
		775
		780									595.774
		785
		790									600.543
		795
		800
		805
		810
		815
		820
		825
		830
		835
		840
		845
		850
		855
		860
		865
		870
		875
		880
		885
		890
		895
		900
		905
		910
		915
		920
		925
		930
		935
		940
		945
		950
		955
		960
		965
		970
		975
		980
		985
		990
		995
		1000
		1005
		1010
		1015
		1020
		1025
		1030
		1035
		1040
		1045
		1050
		1055
		1060
		1065
		1070
		1075
		1080
		1085
		1090
		1095
		1100
		1105
		1110
		1115
		1120
		1125
		1130
		1135
		1140
		1145
		1150
		1155
		1160
		1165
		1170
		1175
		1180
		1185
[truncated: 1 more columns]

## Sheet: Figure 5
		Figure 5a	Full Mazes																		Figure 5b	Half Maze																	Figure 5c	Time to Escape vs Velocity
			Honeycomb Time to Escape (hr)					Square Time to Escape (hr)							Boomerang Time to Escape (hr)							Honeycomb Time to Escape (hr)								Square Time to Escape (hr)				Boomerang Time to Escape (hr)									Square Time to Escape (hr)						Boomerang Time to Escape (hr)
			T. versicolor	A. fumigatus	R. stolonifer	A fumigatus clinical		T. versicolor	A. fumigatus	A. fumigatus Hook KO	N. crassa	R. stolonifer	A. nidulans A850		T. versicolor	A. fumigatus Hook KO	R. stolonifer					A. fumigatus	A. fumigatus Hook KO	R. stolonifer	A. nidulans A850	M. anisopliae	A. fumigatus 293	R. microsporus		N. crassa	A. nidulans A850	Metarhizium anisopliae		N. crassa	R. microsporus					Velocity (um/min)	T. versicolor	A. fumigatus	A. fumigatus Hook KO	N. crassa	R. stolonifer	A. nidulans A850		Velocity (um/min)	T. versicolor
			4.25083	5.66667	7.49972	6.8325		4.99917	5.33278	3.91806	4.50083	2.99972	4.16778		7.5	4.41611	1.5					2.50056	2.08306	9.26611	2.33278	6.24972	3.66583	10.0003		1.83389	2.25056	5.76611		1.41694	5.50028					4.0816	4.41639							4.0816	6.99991
			4.25028					4.25				7.50056			8.75										2.24917															2.96141		5.33278						2.88832
			3.5					4							4.74972										2.41667															2.88832			3.91806					3.3805
																																								1.30095
																																								3.13501				4.50083
																																								3.3805					5.25014
																																								3.83036						4.16778
[truncated: 23 more columns]

## Sheet: Figure 6
	Figure 6a															Figure 6b					Figure 6c														Figure 6d
								Distance (um)									Velocity (um/min)					Square Time to Escape (hr)				Honeycomb Time to Escape (hr)				Boomerang Time to Escape (hr)							Honeycomb			Square			Boomerang
	Minutes	R. stolonifer 1	R. stolonifer 2	R. stolonifer 3	R. stolonifer 4	R. stolonifer new 1	R. stolonifer new 2	R. stolonifer new 3	R. stolonifer new 4	R. stolonifer new 5	R. stolonifer new 6	R. stolonifer new 7	R. stolonifer new 8	R. stolonifer new 9			R. stolonifer	R. stolonifer new				Velocity (um/min)	R. stolonifer	R. stolonifer new		Velocity (um/min)	R. stolonifer	R. stolonifer new		Velocity (um/min)	R. stolonifer	R. stolonifer new					R. stolonifer	R. stolonifer new		R. stolonifer	R. stolonifer new		R. stolonifer	R. stolonifer new
	0	0	0	0	0	0	0	0	0	0	0	0	0	0			1.68943	5.16567				3.3805	5.25014			3.3805	7.49972			3.3805	1.5						7.49972	3		2.99972	2.5		1.5	3.5
	5																4.28951	3.82907				3.71438		9.15		3.71438		8.9		3.71438		8.3						2.5		7.50056	2.5			3.5
	10																5.68822	5.45354																				5			2.25			2.75
	15	37.0592	27.655	92.3549	22.1209	55.5243	75.7481	93.6709	75.8692	181.65	101.058	30.3961	27.7319	30.3961			1.85485	6.34378																				23			25.75			17.5
	20																	4.97579																				11			12.75			14.25
	25																	3.53461
	30	56.3105	95.8707	230.744	51.6726	126.549	159.368	179.47	270.174	267.449	192.186	55.6454	48.5611	61.0949				1.15626
	35																	1.76226
	40																	1.20844
	45	83.9655	213.865	287.927	90.4271	204.78	237.719	272.838	383.705	343.137	300.691	73.5077	68.7242	92.2782
	50
	55
	60	93.1838	309.893	361.702	125.495	275.805	318.614	328.847	461.936	411.316	348.889	81.5003	104.873	120.01
	65
	70
	75	107.933	372.692	442.823	167.936	356.579	391.94	447.525	540.167	487.004	381.768	94.3369	142.716	150.285
	80
	85
	90	148.494	431.69	525.803	208.491	450.492	450.008	508.136	633.535	539.985	429.784	102.329	170.569	180.681
	95
	100
	105	159.713	494.489	606.924	265.637	539.137	501.051	616.762	726.903	610.647	470.171	102.329	205.87	210.23
	110
	115
	120	179.565	566.42	682.543	326.498	632.505	544.042	702.864	825.297	693.964	513.04	109.898	236.266	226.397
	125
	130
	135	226.242	654.931		396.648	713.4	581.946	791.146	928.777	749.488	558.453	117.467	261.637	250.193
	140
	145
	150	253.897	721.303		463.239	817.304	619.85	882.274	1012.09	807.495	586.306	125.036	291.912	270.537
	155
	160
	165	287.083	772.926		501.993	895.656	667.866	970.616	1113.03	860.476	621.606	132.181	329.755	290.882
	170
	175
	180	322.113	811.814		503.837	989.327	716.851	1023.6	1188.78	923.569	669.804	135.753	360.03	303.477
	185
	190
	195	351.841	867.253		542.548	1065.38	762.567	1084.21	1236.79	989.145	700.2	143.746	380.193	332.238
	200
	205
	210	366.59	911.501		577.616	1143.73	811.552	1164.98		1052.24	745.673	152.828	415.494	354.944
	215
	220
	225	394.488	965.096		601.866	1199.25	869.619	1226.8		1117.81	796.172	159.973	440.743	372.625
	230
	235
	240	423.986			628.26	1240.85	920.118			1203.61	854.179	170.085	468.596	397.874
	245
	250
	255	446.411			646.422		975.824			1271.79	914.789	180.5	496.45	423.123
	260
	265
	270	468.535			663.113		1042.19				967.771	190.611	524.666	431.116
	275
	280
	285	490.659			674.331		1062.53				1018.21	194.184	548.583	443.953
	290
	295
	300	512.854			681.704		1166.25				1063.62	217.011	571.834	469.323
	305
	310
	315	529.447			697.452		1206.7				1116.6	234.874	597.568	485.308
	320
	325
	330	551.571			722.531						1167.28	245.288	615.43	500.627
	335
	340
	345	573.695			731.748						1215.78	261.273	641.164	516.794
	350
	355
	360	598.292			746.495						1274.03	269.266	668.896	531.508
	365
	370
	375	624.689			763.086							278.348	686.758	549.37
	380
	385
	390	654.245			776.504							288.763	717.154	559.482
	395
	400
	405	685.644			791.366							298.875	739.861	572.319
	410
	415
	420	722.518			800.583							304.506	760.69	589.999
	425
	430
	435	742.798			811.329							308.078	788.543	600.111
	440
	445
	450	774.198			825.362							322.792	811.37	612.706
	455
	460
	465	801.853			842.853							322.792	851.757	631.052
	470
	475
	480	840.741			856.886							333.207	877.491	639.045
	485
	490
	495	877.615			873.476							343.621	906.252	649.459
	500
	505
	510	909.443			918.361							356.216	929.079	662.296
	515
	520
	525	937.641			936.881							365.298	959.475	680.158
	530
	535
	540	981.46			972.106							389.215	987.328	689.241
	545
	550
	555	1000.27			1003.66							404.535	1018.51	709.404
	560
	565
	570	1020.55			1031.55							422.397	1041.34	722.967
	575
	580
	585	1037.54			1063.11							447.646	1056.48	733.382
	590
	595
	600	1055.98			1092.83							462.965	1084.33	746.945
	605
	610
	615	1071.18			1122.84							488.336	1107.16	770.196
	620
	625
	630	1082.85			1143.2							500.93	1127.99	783.033
	635
	640
	645	1103.46			1172.92							526.664	1150.69	805.739
	650
	655
	660	1131.36			1209.83							541.983	1171.04	818.576
	665
	670
	675	1149.79			1241.17							562.146	1196.29	843.946
	680
	685
	690	1170.16			1279.93							577.465	1219.11	856.783
	695
	700
	705	1194.12										595.328	1244.85	869.377
	710
	715
	720	1216.32										616.157	1268.1	889.722
	725
	730
	735											632.142		900.136
	740
	745
	750											644.979		925.87
	755
	760
	765											665.142		943.732
	770
	775
	780											683.488		953.844
	785
	790
	795											701.351		974.007
	800
	805
	810											727.69		989.145
	815
	820
	825											755.906		1006.83
	830
	835
	840											768.501		1019.42
	845
	850
	855											791.328		1044.79
	860
	865
	870											816.698		1062.65
	875
	880
	885											837.043		1072.76
	890
	895
	900											864.775		1098.01
	905
	910
	915											885.12		1112.3
	920
	925
	930											903.467		1127.44
	935
	940
	945											931.683		1142.58
	950
	955
	960											959.536		1167.83
	965
	970
	975											994.958		1183.81
	980
	985
	990											1022.81		1197.38
	995
	1000
	1005											1056.48		1215.06
	1010
	1015
	1020											1074.34		1231.04
	1025
	1030
	1035											1104.61		1256.41
	1040
	1045
	1050											1147.6		1274.76
	1055
	1060
	1065											1185.51		1287.6
	1070
	1075
	1080											1216.21
	1085
	1090
	1095											1266.64

## Sheet: Figure 7
	Figure 7b	Branches vs Velocity										Nubs vs Velocity											Figure 7c	Branches vs Time to Escape										Nubs vs Time to Escape
		Square			Honeycomb			Boomerang				Boomerang			Square			Honeycomb						Honeycomb			Boomerang			Square				Boomerang			Square			Honeycomb
		Velocity (um/min)	Branches		Velocity (um/min)	Branches		Velocity (um/min)	Branches			Velocity (um/min)	Nubs		Velocity (um/min)	Nubs		Velocity (um/min)	Nubs					Time to Escape (hr)	Branches		Time to Escape (hr)	Branches		Time to Escape (hr)	Branches			Time to Escape (hr)	Nubs		Time to Escape (hr)	Nubs		Time to Escape (hr)	Nubs
		4.49737	3		4.49737	0		4.49737	6			4.49737	4		4.49737	0		4.49737	2					3	0		3.5	6		2.5	3			3.5	4		2.5	0		3	2
		5.45354	3		5.45354	0		5.45354	4			5.45354	1		5.45354	0		5.45354	0					2.5	0		3.5	4		2.5	3			3.5	1		2.5	0		2.5	0
		5.65978	6		5.65978	4		5.65978	7			5.65978	0		5.65978	1		5.65978	0					5	4		2.25	7		2.25	6			2.25	0		2.25	1		5	0
		2.34543	4		2.34543	4		2.34543	4			2.34543	9		2.34543	7		2.34543	2					23	4		17.5	4		25.75	4			17.5	9		25.75	7		23	2
		1.48535	3		1.48535	3		1.48535	7			1.48535	5		1.48535	13		1.48535	5					14.25	3		14.25	7		12.75	3			14.25	5		12.75	13		14.25	5
